# Supplementary material
Source: publisher figshare collection journal article supplement (https://acs.figshare.com/ndownloader/files/22616897)
Supplement: Supplementary file 1 [file 22616897]

Compound,SMILES,S. aureus ATCC 29213 MIC (�g/mL)
48,O=C1N(C2=CC(C(O)=O)=CC=C2)C(/C=C/C3CC3)=NC4=C1C=CC=C4,> 128
49,O=C1N(C2=CC(C(O)=O)=CC=C2)C(/C=C/C3=NC=CS3)=NC4=CC=CC=C41,> 128
50,O=C1N(C2=CC(C(O)=O)=CC=C2)C(/C=C/C3=CN=CS3)=NC4=CC=CC=C41,> 128
51,O=C1N(C2=CC(C(O)=O)=CC=C2)C(/C=C/C3=CSC=C3)=NC4=CC=CC=C41,32
52,O=C1N(C2=CC(C(O)=O)=CC=C2)C(/C=C/C3=CC=CS3)=NC4=CC=CC=C41,8
53,O=C1N(C2=CC(C(O)=O)=CC=C2)C(/C=C/C3=CC=C(Cl)S3)=NC4=CC=CC=C41,0.5
54,O=C1N(C2=CC(C(O)=O)=CC=C2)C(/C=C/C3=CC=C(Br)S3)=NC4=CC=CC=C41,0.25
55,O=C1N(C2=CC(C(O)=O)=CC=C2)C(/C=C/C3=CC=C(C#N)S3)=NC4=CC=CC=C41,4
56,O=C1N(C2=CC(C(O)=O)=CC=C2)C(/C=C/C3=CC(Cl)=CS3)=NC4=CC=CC=C41,4
58,O=C1N(C2=CC(C(O)=O)=CC=C2)C(/C=C/C3=CC=C(Cl)C=C3)=NC4=CC=CC=C41,0.25
59,O=C1N(C2=CC(C(O)=O)=CC=C2)C(/C=C/C3=CC=C(I)C=C3)=NC4=CC=CC=C41,0.5
60,O=C1N(C2=CC(C(O)=O)=CC=C2)C(/C=C/C3=CC=NC=C3)=NC4=CC=CC=C41,64
61,O=C1N(C2=CC(C(O)=O)=CC=C2)C(/C=C/C3=CC=NC(F)=C3)=NC4=CC=CC=C41,> 128
62,O=C1N(C2=CC(C(O)=O)=CC=C2)C(/C=C/C3=CC=[N+]([O-])C=C3)=NC4=CC=CC=C41,> 128
63,O=C1N(C2=CC(C(O)=O)=CC=C2)C(/C=C/C3=CC=CN=C3)=NC4=CC=CC=C41,> 128
64,O=C1N(C2=CC(C(O)=O)=CC=C2)C(/C=C/C3=CN=C(C#N)C=C3)=NC4=CC=CC=C41,64
65,O=C1N(C2=CC(C(O)=O)=CC=C2)C(/C=C/C3=CC=CN=C3F)=NC4=CC=CC=C41,> 128
66,O=C1N(C2=CC(C(O)=O)=CC=C2)C(/C=C/C(C=CN3)=CC3=O)=NC4=CC=CC=C41,> 128
67,O=C1N(C2=CC(C(O)=O)=CC=C2)C(/C=C/C(C=C3)=CNC3=O)=NC4=CC=CC=C41,> 128
68,O=C1N(C2=CC(C(O)=O)=CC=C2)C(/C=C/C3=CC=CNC3=O)=NC4=CC=CC=C41,> 128
69,O=C1N(C2=C(F)C(C(O)=O)=CC=C2)C(/C=C/C3=CC=C(C#N)C=C3)=NC4=CC=CC=C41,8
70,O=C1N(C2=C(F)C(C(O)=O)=C(F)C=C2)C(/C=C/C3=CC=C(C#N)C=C3)=NC4=CC=CC=C41,64
71,O=C1N(C2=CC(C(O)=O)=C(F)C=C2)C(/C=C/C3=CC=C(C#N)C=C3)=NC4=CC=CC=C41,16
72,O=C1N(C2=CC(C(O)=O)=CC(F)=C2)C(/C=C/C3=CC=C(C#N)C=C3)=NC4=CC=CC=C41,> 128
73,O=C1N(C2=CC(C(O)=O)=CC=C2F)C(/C=C/C3=CC=C(C#N)C=C3)=NC4=CC=CC=C41,0.5
74,O=C(N1C2=CC(C(O)=O)=CC=C2Cl)C(C=CC=C3)=C3N=C1/C=C/C4=CC=C(C#N)C=C4,2
75,O=C(N1C2=CC(C(O)=O)=CC=C2C)C(C=CC=C3)=C3N=C1/C=C/C4=CC=C(C#N)C=C4,2
76,O=C(N1C2=CC(C(O)=O)=CC=C2C(F)(F)F)C3=CC=CC=C3N=C1/C=C/C4=CC=C(C#N)C=C4,> 128
77,OC1=CC(N(C2=O)C(/C=C/C3=CC=C(C#N)C=C3)=NC4=C2C=CC=C4)=CC(C(O)=O)=C1,> 128
78,O=C1N(C2=CC(C(O)=O)=CC=C2O)C(/C=C/C3=CC=C(C#N)C=C3)=NC4=CC=CC=C41,> 128
79,O=C1N(C2=CC(C(O)=O)=CC=C2OC)C(/C=C/C3=CC=C(C#N)C=C3)=NC4=CC=CC=C41,> 128
80,O=C1N(C2=C(O)C(C(OC)=O)=CC=C2)C(/C=C/C3=CC=C(C#N)C=C3)=NC4=C1C=CC=C4,> 128
81,O=C1N(C2=C(O)C(C(O)=O)=CC=C2)C(/C=C/C3=CC=C(C#N)C=C3)=NC4=C1C=CC=C4,> 128
82,O=C1N(C2=NC(C(OC)=O)=CC=C2)C(/C=C/C3=CC=C(C#N)C=C3)=NC4=C1C=CC=C4,> 128
83,O=C1N(C2=NC(C(O)=O)=CC=C2)C(/C=C/C3=CC=C(C#N)C=C3)=NC4=C1C=CC=C4,> 128
84,O=C1N(C2=CC(C(O)=O)=CC=N2)C(/C=C/C3=CC=C(C#N)C=C3)=NC4=CC=CC=C41,> 128
85,O=C1N(C2=CC(NC(N3)=O)=C3C=C2)C(/C=C/C4=CC=C(C#N)C=C4)=NC5=CC=CC=C51,> 128
86,O=C1N(C2=CC(NC(N3)=S)=C3C=C2)C(/C=C/C4=CC=C(C#N)C=C4)=NC5=CC=CC=C51,> 128
87,O=C1N(C2=CC(NC=N3)=C3C=C2)C(/C=C/C4=CC=C(C#N)C=C4)=NC5=CC=CC=C51,> 128
88,O=C1N(C2=CC(NC(C(F)(F)F)=O)=CC=C2)C(/C=C/C3=CC=C(C#N)C=C3)=NC4=C1C=CC=C4,2
89,O=C1N(C2=CC(NC(CCNC)=O)=CC=C2)C(/C=C/C3=CC=C(C#N)C=C3)=NC4=CC=CC=C41,> 128
90,O=C1N(C2=CC(NC(CCC3=CN=CN3)=O)=CC=C2)C(/C=C/C4=CC=C(C#N)C=C4)=NC5=CC=CC=C51,8
91,O=C1N(C2=CC(NC(CN3CCOCC3)=O)=CC=C2)C(/C=C/C4=CC=C(C#N)C=C4)=NC5=CC=CC=C51,32
92,O=C1N(C2=CC(NC(NCC3=CN=CN3)=O)=CC=C2)C(/C=C/C4=CC=C(C#N)C=C4)=NC5=CC=CC=C51,> 128
93,O=C(NC1=CC=CC(N2C(/C=C/C3=CC=C(C#N)C=C3)=NC4=C(C=CC=C4)C2=O)=C1)NCCC5=CN=CN5,16
94,O=C1N(C2=CC(S(=O)(N)=O)=CC=C2)C(/C=C/C3=CC=C(C#N)C=C3)=NC4=C1C=CC=C4,0.25
95,O=C1N(C2=CC(S(=O)(NC(C)=O)=O)=CC=C2)C(/C=C/C3=CC=C(C#N)C=C3)=NC4=C1C=CC=C4,4
96,O=C1N(C2=CC(C(N)=O)=CC=C2)C(/C=C/C3=CC=C(C#N)C=C3)=NC4=C1C=CC=C4,2
97,O=C1N(C2=CC(CN3C(C(C=CC=C4)=C4C3=O)=O)=CC=C2)C(/C=C/C5=CC=C(C#N)C=C5)=NC6=CC=CC=C61,> 128
98,O=C1N(C2=CC(CN)=CC=C2)C(/C=C/C3=CC=C(C#N)C=C3)=NC4=CC=CC=C41,32
99,O=C1N(C2=CC(CNC(C(F)(F)F)=O)=CC=C2)C(/C=C/C3=CC=C(C#N)C=C3)=NC4=CC=CC=C41,0.5
100,O=C(N1C2=C(O)C=CC=C2)C(C=CC=C3)=C3N=C1/C=C/C4=CC=C(C#N)C=C4,0.015
101,O=C1N(C2=C([N+]([O-])=O)C=CC=C2)C(/C=C/C3=CC=C(C#N)C=C3)=NC4=CC=CC=C41,> 128
102,O=C1N(C2=C(C(O)=O)C=CC=C2)C(/C=C/C3=CC=C(C#N)C=C3)=NC4=CC=CC=C41,32
103,O=C1N(C2=CC=C([N+]([O-])=O)C=C2)C(/C=C/C3=CC=C(C#N)C=C3)=NC4=C1C=CC=C4,> 128
104,O=C1N(C2=CC=C(N)C=C2)C(/C=C/C3=CC=C(C#N)C=C3)=NC4=C1C=CC=C4,> 128
105,O=C1N(C2=CN=CC=C2)C(/C=C/C3=CC=C(C#N)C=C3)=NC4=CC=CC=C41,> 128
106,O=C1N(C2=C[N+]([O-])=CC=C2)C(/C=C/C3=CC=C(C#N)C=C3)=NC4=CC=CC=C41,2
107,O=C1N(C2=CC(C#N)=CC=C2)C(/C=C/C3=CC=C(C#N)C=C3)=NC4=CC=CC=C41,> 128
108,O=C1N(C2=CC(N=[N+]=[N-])=CC=C2)C(/C=C/C3=CC=C(C#N)C=C3)=NC4=C1C=CC=C4,16
109,O=C1N(C(C)C(O)=O)C(/C=C/C2=CC=C(C#N)C=C2)=NC3=CC=CC=C31,128
110,O=C1N(CCC(O)=O)C(/C=C/C2=CC=C(C#N)C=C2)=NC3=CC=CC=C31,> 128
113,O=C1N(C2=CC(S(=O)(N)=O)=CC=C2)C(/C=C/C3=CC=C(C#C)C=C3)=NC4=CC=CC=C41,0.06
114,O=C1N(C2=CC(C(O)=O)=CC=C2)C(CCC3=CC=C(C#N)C=C3)=NC4=CC=CC=C41,8
115,O=C1N(C2=CC(C(O)=O)=CC=C2)C(CCC3=CC=C(F)C=C3)=NC4=CC=CC=C41,2
116,O=C1N(C2=CC(C(OC)=O)=CC=C2)C(NCC3=CC=C(C#N)C=C3)=NC4=C1C=CC=C4,16
117,O=C1N(C2=CC(C(OC)=O)=CC=C2)C(NCC3=CC=C(F)C=C3)=NC4=C1C=CC=C4,> 128
118,O=C1N(C2=CC(C(O)=O)=CC=C2)C(NCC3=CC=C(C#N)C=C3)=NC4=CC=CC=C41,> 128
119,O=C1N(C2=CC([N+]([O-])=O)=CC=C2)C(NCC3=CC=C(C#N)C=C3)=NC4=CC=CC=C41,> 128
120,O=C1N(C2=CC([N+]([O-])=O)=CC=C2)C(NCC3=CC=C(F)C=C3)=NC4=CC=CC=C41,> 128
121,O=C1N(C2=CC(N)=CC=C2)C(NCC3=CC=C(C#N)C=C3)=NC4=C1C=CC=C4,8
122,O=C1N(C2=CC(N)=CC=C2)C(NCC3=CC=C(F)C=C3)=NC4=C1C=CC=C4,64
123,O=C1N(C2=CC(NS(C)(=O)=O)=CC=C2)C(NCC3=CC=C(C#N)C=C3)=NC4=CC=CC=C41,0.125
124,O=C1N(C2=CC(C(O)=O)=CC=C2)C(SCC3=CC=CC=C3)=NC4=CC=CC=C41,0.25
125,O=C1N(C2=CC(C(O)=O)=CC=C2)C(SCC3=CC=C(C#N)C=C3)=NC4=CC=CC=C41,2
126,O=C1N(C2=CC(C(O)=O)=CC=C2)C(OCC3=CC=C(C#N)C=C3)=NC4=CC=CC=C41,> 128
127,O=C1N(C2=CC([N+]([O-])=O)=CC=C2)C(N3CCCCC3)=NC4=C1C=CC=C4,> 128
128,O=C1N(C2=CC(N)=CC=C2)C(N3CCCCC3)=NC4=C1C=CC=C4,> 128
129,O=C1N(C2=CC(N)=CC=C2)C(N3CCN(C4=CC=C(Cl)C=C4)CC3)=CC5=C1C=CC=C5,> 128
